# Supplementary material
Source: MDPI journal article supplement (https://www.mdpi.com/2071-1050/16/7/2665)
Supplement: s1 [file s1]

Supplementary Information:

The research articles for section 2.1 were searched in the following scientific databases: Scopus and Web of Science. Finally, 32 studies are found and 12 studies are finally selected to be reviewed in this study. The inclusion criteria for the selection of publications were as follows:

- Types: articles and conference papers.
- Language: English.
- Keywords: “district renovation” OR “historic district” And “social sustainability”.

**Table S1.** Attributes for socially sustainable renovation.

| <b>Factor</b>                          | <b>Reference</b>                   |
|----------------------------------------|------------------------------------|
| Facilities/Social infrastructure       | [11], [12], [13], [14], [15], [22] |
| Built environment                      | [22]                               |
| Justice and equity                     | [12]                               |
| Heritage protecting                    | [2], [21]                          |
| Cultural identity/Sense of place       | [2], [17], [18], [19], [20]        |
| Public engagement/Public participation | [2], [14], [16], [17], [19], [20]  |

**Table S2.** Pathways for citizen participation.

| <b>Factor</b>                       | <b>Reference</b> |
|-------------------------------------|------------------|
| Self-initiated participation        | [16]             |
| Lead by Owners Management Committee | [2], [16], [17]  |
| Questionnaire                       | [16]             |

The research articles for section 2.2 were searched in the following scientific databases: Scopus and Web of Science. Finally, 25 studies are found and 13 studies are finally selected to be reviewed in this study. The inclusion criteria for the selection of publications were as follows:

- Types: articles and conference papers.
- Language: English.
- Keywords: “district renovation” OR “historic district” And “virtual reality”.

**Table S3.** VR technology applied in urban district renovation

| Year | Location              | Scale    | Test                                                        | Reference |
|------|-----------------------|----------|-------------------------------------------------------------|-----------|
| 2014 | Vilnius,<br>Lithuania | City     | Environment management                                      | [24]      |
| 2015 | Germany.              | Building | Human behavior                                              | [25]      |
| 2016 | Naples, Italy         | District | Acoustic environment, visual environment                    | [28]      |
| 2018 | Naples, Italy         | District | Acoustic environment, visual environment,<br>human behavior | [37]      |
| 2020 | Naples, Italy         | City     | Visual environment                                          | [38]      |
| 2020 | Macau, China          | City     | Visual environment                                          | [39]      |
| 2020 | Oslo, Norway          | Distict  | Visual environment                                          | [40]      |
| 2020 | Boston, USA           | City     | Human behavior                                              | [36]      |
| 2020 | Barcelona,<br>Spain   | District | Training and learning                                       | [42]      |
| 2020 | Rome, Italy<br>New    | Building | Training and learning                                       | [43]      |
| 2021 | Rochelle,<br>USA      | City     | Visual environment                                          | [41]      |
| 2022 | Seoul, Korea          | Street   | Training and learning                                       | [44]      |
| 2022 | Alexandria,<br>Egypt  | District | Training and learning                                       | [45]      |
